# Supplementary material
Source: PubMed Central journal article supplement (PMC3005605)
Supplement: supp_138.2.303_DEV055566-TableS1.pdf [file supp_138.2.303_DEV055566-TableS1.pdf]

**Table S1. Primers used for quantitative real-time PCR analyses**

|        | Forward (5'→3')          | Reverse (5'→3')         |
|--------|--------------------------|-------------------------|
| Nkx2-5 | CGACGGAAGCCACGCGTGCT     | CCGCTGTCGCTTGCACTTG     |
| Gata4  | CTGTCATCTCACTATGGGCA     | CCAAGTCCGAGCAGGAATTT    |
| Tbx20  | CTATGGGGGAAGAGGATGTTCTG  | TCAGATGTTGTAAAGGCTGATCC |
| Bmp10  | GTGGATCCACCAGAGTACATG    | AACCGCAGTTCAGCCATGACG   |
| Mlc2a  | CACCGTCTTCCTCACACTCTT    | AGGCACTCAGGATGGCTTC     |
| Mlc2v  | CCCAGATCCAGGAGTTCAAG     | TTGTCGATGAAGCCGTCTCT    |
| Gapdh  | TCCTGGTATGACAATGAATACGGC | TCTTGCTCAGTGTCCTTGCTGG  |
