# Supplementary material
Source: PubMed Central journal article supplement (PMC3005605)
Supplement: supp_138.2.303_DEV055566-TableS2.pdf [file supp_138.2.303_DEV055566-TableS2.pdf]

**Table S2. Genotype distribution of *Daam1* embryos and offspring (mating: *Daam1*<sup>gt/+</sup> × *Daam1*<sup>gt/+</sup>)**

|                       | Wild type | Het       | Mut       | <i>P</i> |
|-----------------------|-----------|-----------|-----------|----------|
| E12.5 [ <i>n</i> (%)] | 15 (23.4) | 34 (53.2) | 15 (23.4) | 0.882    |
| E14.5 [ <i>n</i> (%)] | 19 (27.1) | 38 (54.3) | 13 (18.6) | 0.462    |
| E16.5 [ <i>n</i> (%)] | 38 (32.8) | 60 (51.7) | 18 (15.5) | 0.03     |
| P1 [ <i>n</i> (%)]    | 50 (32.6) | 98 (64.1) | 5 (3.3)   | <0.001   |

*P* was calculated by the comparison of genotype distribution and expected Mendelian Ratio.
