# Supplementary material
Source: PubMed Central journal article supplement (PMC3005605)
Supplement: supp_138.2.303_DEV055566-TableS3.pdf [file supp_138.2.303_DEV055566-TableS3.pdf]

**Table S3. Characterization of cardiac phenotypes of *Daam1*<sup>gt/gt</sup> mice at E14.5**

|                            | Wild type [number of embryos (%) ] | Mut [number of embryos (%) ] |
|----------------------------|------------------------------------|------------------------------|
| Cardiac defects            |                                    |                              |
| DORV+VN                    | 0 (0)                              | 5 (41.7)                     |
| VSD+VN                     | 0 (0)                              | 5 (41.7)                     |
| VN                         | 0 (0)                              | 2 (16.6)                     |
| The number of mice checked | 14                                 | 12                           |

DORV, double outlet right ventricle; VN, ventricular noncompaction; VSD, ventricular septal defects.
