# Supplementary material
Source: PubMed Central journal article supplement (PMC3005605)
Supplement: supp_138.2.303_DEV055566-TableS4.pdf [file supp_138.2.303_DEV055566-TableS4.pdf]

**Table S4. Echocardiographic analyses of 2-month-old *Daam1* mice**

|                             | HR (bpm) | LVIDd (mm) | LVIDs (mm) | FS (%)     | EF (%)     | FWTd (mm) | RWTd (mm) |
|-----------------------------|----------|------------|------------|------------|------------|-----------|-----------|
| Wild type<br>( <i>n</i> =9) | 506±15.7 | 3.02±0.10  | 1.42±0.15  | 53.54±4.28 | 68.35±3.99 | 0.91±0.03 | 0.7±0.06  |
| Mut<br>( <i>n</i> =11)      | 460±28.6 | 2.71±0.11  | 1.26±0.15  | 54.29±3.58 | 70.42±2.93 | 1.18±0.07 | 0.93±0.07 |
| <i>P</i>                    | 0.2      | 0.051      | 0.46       | 0.89       | 0.67       | 0.006     | 0.034     |

HR, heart rate; LVIDd, left ventricular internal diameter in diastole; LVIDs, left ventricular internal diameter in systole; FS, fractional shortening; EF, ejection fraction; FWTd, front wall thickness of LV in diastole; RWTd, rear wall thickness of LV in diastole.
