# Supplementary material
Source: PubMed Central journal article supplement (PMC3005605)
Supplement: supp_138.2.303_DEV055566-TableS5.pdf [file supp_138.2.303_DEV055566-TableS5.pdf]

**Table S5. Echocardiographic analyses of 6-month-old *Daam1* mice**

|                             | HR (bpm) | LVIDd (mm) | LVIDs (mm) | FS (%)     | EF (%)     | FWTd (mm) | RWTd (mm) |
|-----------------------------|----------|------------|------------|------------|------------|-----------|-----------|
| Wild type<br>( <i>n</i> =8) | 473±15.5 | 2.98±0.14  | 1.67±0.13  | 44.56±2.06 | 58.02±6.05 | 0.87±0.07 | 1.09±0.06 |
| Mut<br>( <i>n</i> =8)       | 415±42.6 | 2.91±0.13  | 1.55±0.16  | 48.84±3.77 | 65.4±5.13  | 1.11±0.07 | 1.29±0.08 |
| <i>P</i>                    | 0.22     | 0.951      | 0.59       | 0.34       | 0.37       | 0.03      | 0.04      |

HR, heart rate; LVIDd, left ventricular internal diameter in diastole; LVIDs, left ventricular internal diameter in systole; FS, fractional shortening; EF, ejection fraction; FWTd, front wall thickness of LV in diastole; RWTd, rear wall thickness of LV in diastole.
