# Supplementary material
Source: PubMed Central journal article supplement (PMC3005605)
Supplement: supp_138.2.303_DEV055566-TableS6.pdf [file supp_138.2.303_DEV055566-TableS6.pdf]

**Table S6. The distribution of genotypes in offspring from the mating of *Daam1*<sup>gt/gt</sup> × *Daam1*<sup>gt/+</sup>/*Nkx2-5*<sup>Cre/+</sup> or *Daam1*<sup>gt/+</sup> × *Daam1*<sup>gt/gt</sup>/*Nkx2-5*<sup>Cre/+</sup>**

|                                               | <i>Nkx2-5</i> <sup>+/+</sup> | <i>Nkx2-5</i> <sup>Cre/+</sup> |
|-----------------------------------------------|------------------------------|--------------------------------|
| <i>Daam1</i> <sup>gt/+</sup> [ <i>n</i> (%)]  | 24 (35.8)                    | 23 (34.3)                      |
| <i>Daam1</i> <sup>gt/gt</sup> [ <i>n</i> (%)] | 4 (5.9)                      | 16 (23.9)                      |
